# Supplementary material for: In situconstruction of an α-MoC/g-C3N4Mott–Schottky heterojunction with high-speed electron transfer channel for efficient photocatalytic H2evolution
Source: Royal Society of Chemistry journal article supplement (doi:10.1039/d2qi01665f), 2022-12-13
Supplement: d2qi01665f1.pdf [file d2qi01665f1.pdf]

## Supporting Information

### In-situ construction of $\alpha$ -MoC/g-C<sub>3</sub>N<sub>4</sub> Mott-Schottky heterojunction for efficient photocatalytic H<sub>2</sub> evolution

Jianfei Du <sup>a#</sup>, Yongli Shen <sup>b#</sup>, Fan Yang <sup>a\*</sup>, Bo Zhang <sup>a</sup>, Xinzhi Jiang <sup>a</sup>, Changhua An <sup>a</sup>,  
<sup>b§</sup>, Jinhua Ye <sup>c, d, e</sup>

<sup>a</sup> *Tianjin Key Laboratory of Organic Solar Cells and Photochemical Conversion, School of Chemistry and Chemical Engineering, Tianjin University of Technology, Tianjin 300384, P. R. China*

<sup>b</sup> *Tianjin Key Laboratory of Advanced Functional Porous Materials, Institute of New Energy Materials & Low-Carbon Technologies, School of Materials Science and Engineering, Tianjin University of Technology, Tianjin 300384, China*

<sup>c</sup> *TU-NIMS Joint Research Center, School of Materials Science and Engineering, Tianjin University, Tianjin 300072, PR China*

<sup>d</sup> *Photocatalytic materials group, International Center for Materials Nanoarchitectonics (WPI-MANA), National Institute for Materials Science, 1-1 Namiki, Tsukuba, Ibaraki 305-0044, Japan*

<sup>e</sup> *Graduate School of Chemical Science and Engineering, Hokkaido University, Sapporo 060-0814, Japan*

*Jianfei Du<sup>#</sup> and Yongli Shen<sup>#</sup> contributed equally to this work.*

\* Corresponding Author. E-mail: fanyang@email.tjut.edu.cn

§ Corresponding Author. E-mail: anchua@ustc.edu

## Contents

|                                                                                                                                                                                                                                                                           |      |
|---------------------------------------------------------------------------------------------------------------------------------------------------------------------------------------------------------------------------------------------------------------------------|------|
| Fig.S1. XRD patterns of 3atz, HAM, m-3atz/HAM, and Mo-3atz.....                                                                                                                                                                                                           | S-4  |
| Fig.S2. FT-IR spectra of HAM, 3atz, and Mo-3atz.....                                                                                                                                                                                                                      | S-5  |
| Fig.S3. SEM images of Mo-3atz .....                                                                                                                                                                                                                                       | S-6  |
| Fig. S4. SEM images of Mo-3atz synthesized under 70 °C (a, b), and as-prepared $\alpha$ -MoC (c, d).....                                                                                                                                                                  | S-7  |
| Fig. S5. XRD pattern of Mo-3atz calcined under Ar atmosphere .....                                                                                                                                                                                                        | S-8  |
| Fig.S6. XRD patterns of Mo-3atz precursor calcined under various temperatures ....                                                                                                                                                                                        | S-9  |
| Fig.S7. XRD patterns of samples synthesized using other ligands .....                                                                                                                                                                                                     | S-10 |
| Fig.S8. N <sub>2</sub> adsorption-desorption isotherms of of CN and MC-15/CN.....                                                                                                                                                                                         | S-11 |
| Fig.S9. The high-resolution O 1s spectrum of of $\alpha$ -MoC.....                                                                                                                                                                                                        | S-12 |
| Fig.S10. XRD patterns of MC-15/CN photocatalyst before and after the recycle test ....                                                                                                                                                                                    | S-13 |
| Fig.S11. HRTEM image and (b) EDS element mapping of MC-15/CN photocatalyst after the recycle test.....                                                                                                                                                                    | S-14 |
| Fig.S12. LSV (a) and Tafel (b) curves of CN, MC-15/CN and MC .....                                                                                                                                                                                                        | S-15 |
| Fig.S13. The models of H* adsorption sites on the surface of g-C <sub>3</sub> N <sub>4</sub> : (a) C site, and (b) N site .....                                                                                                                                           | S-16 |
| Fig.S14. The models of H* adsorption sites of on the surface of $\alpha$ -MoC ( $\alpha$ -MoC/g-C <sub>3</sub> N <sub>4</sub> ): (a) C <sub>1</sub> site, (b) Mo <sub>1</sub> site, (c) Mo <sub>2</sub> site, (d)Mo <sub>3</sub> site, and (e) Mo <sub>4</sub> site ..... | S-17 |
| Table S1. Comparison of the synthesis temperature and size of molybdenum carbide from literatures.....                                                                                                                                                                    | S-18 |

|                                                                                                                                                                 |      |
|-----------------------------------------------------------------------------------------------------------------------------------------------------------------|------|
| Table S2. Comparison of various cocatalysts coupled with g-C <sub>3</sub> N <sub>4</sub> photocatalyst for solar H <sub>2</sub> evolution from literatures..... | S-19 |
| Table S3. Kinetic analysis of emission decay of g-C <sub>3</sub> N <sub>4</sub> and composite photocatalysts .....                                              | S-20 |
| Table S4. The $\Delta G_{H^*}$ values of all the adsorption models .....                                                                                        | S-21 |

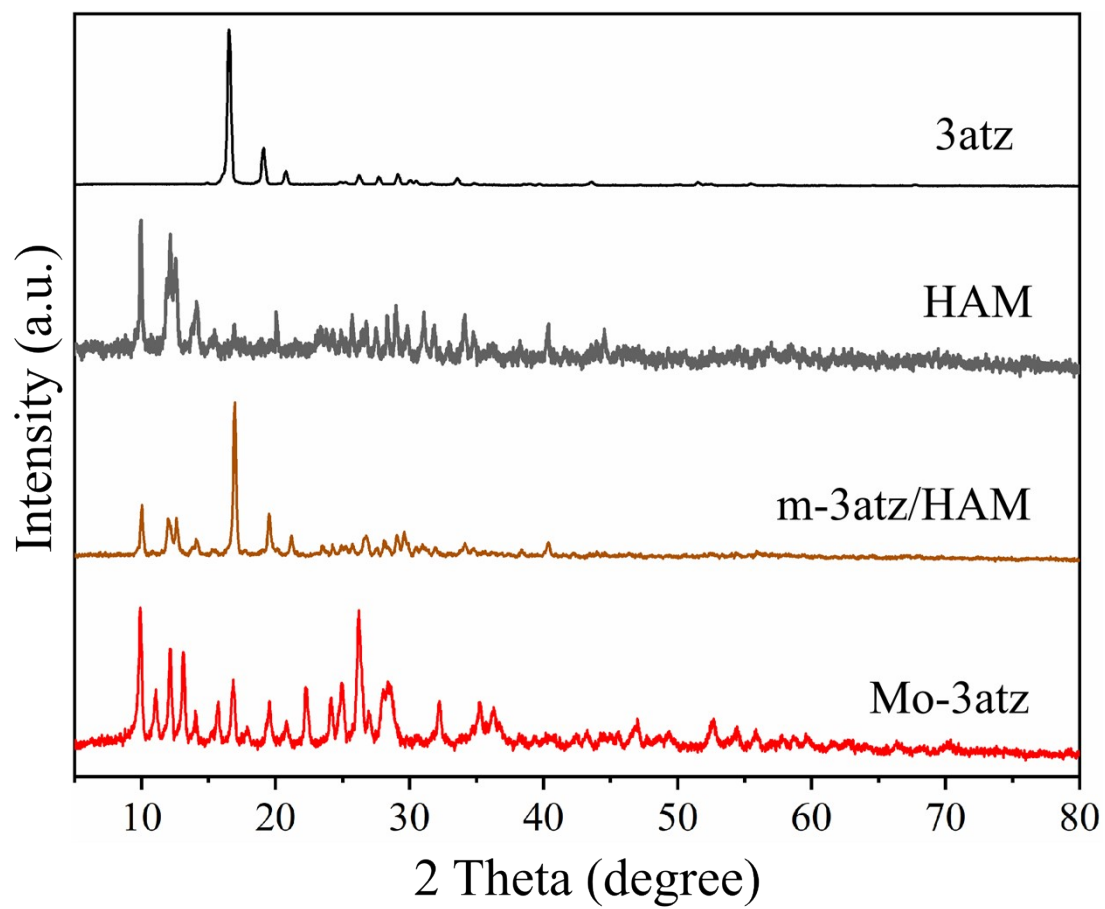

Fig. S1. XRD patterns of 3atz, HAM, m-3atz/HAM, and Mo-3atz.

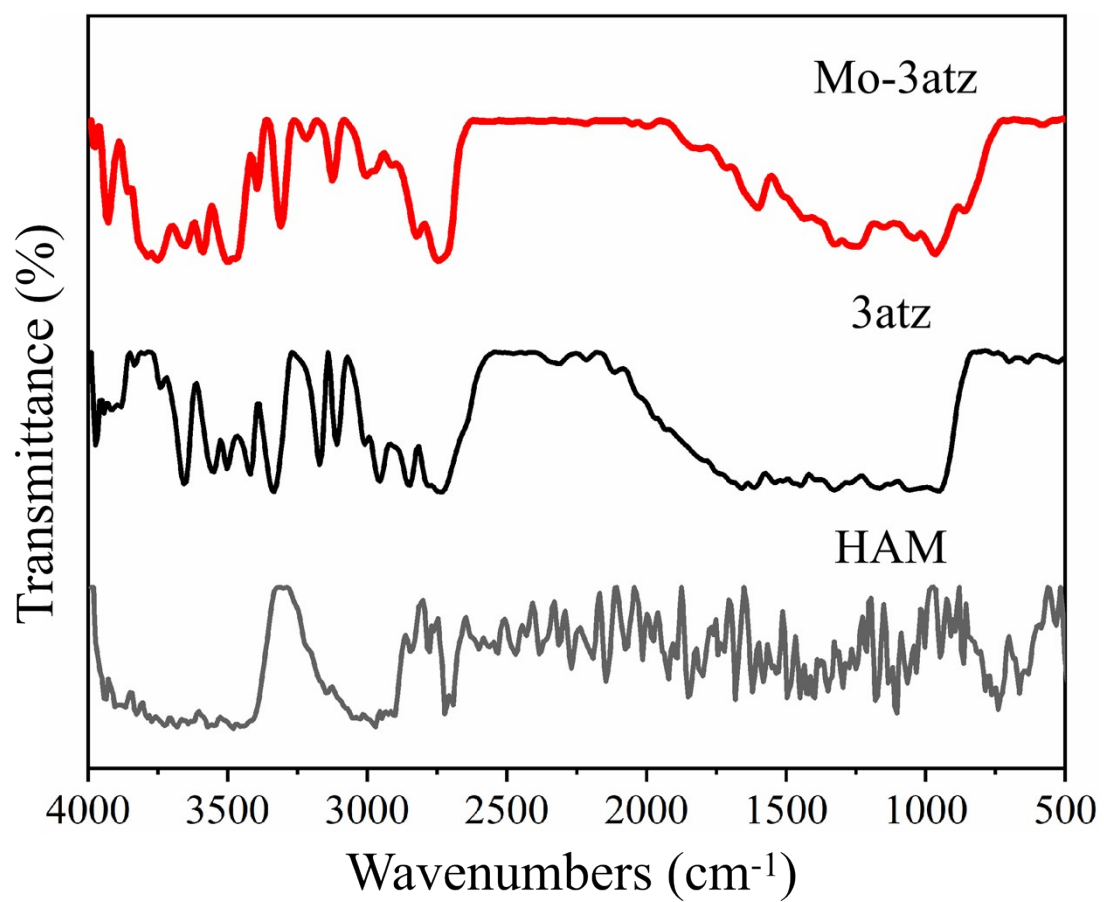

Fig. S2. FT-IR spectra of HAM, 3atz, and Mo-3atz.

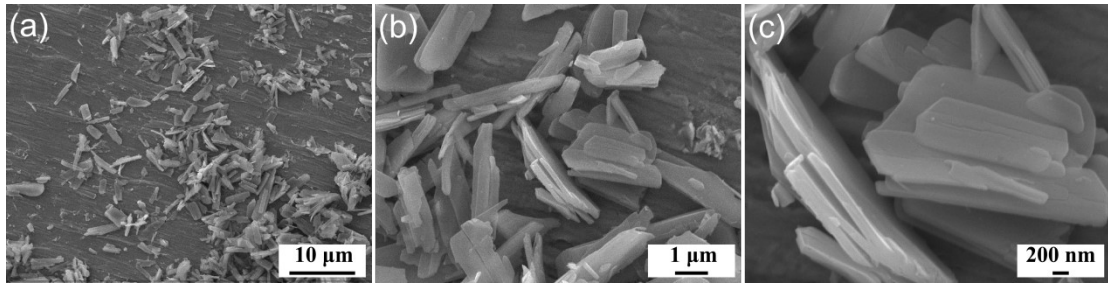

Fig. S3. SEM images of Mo-3atz synthesized in room temperature.

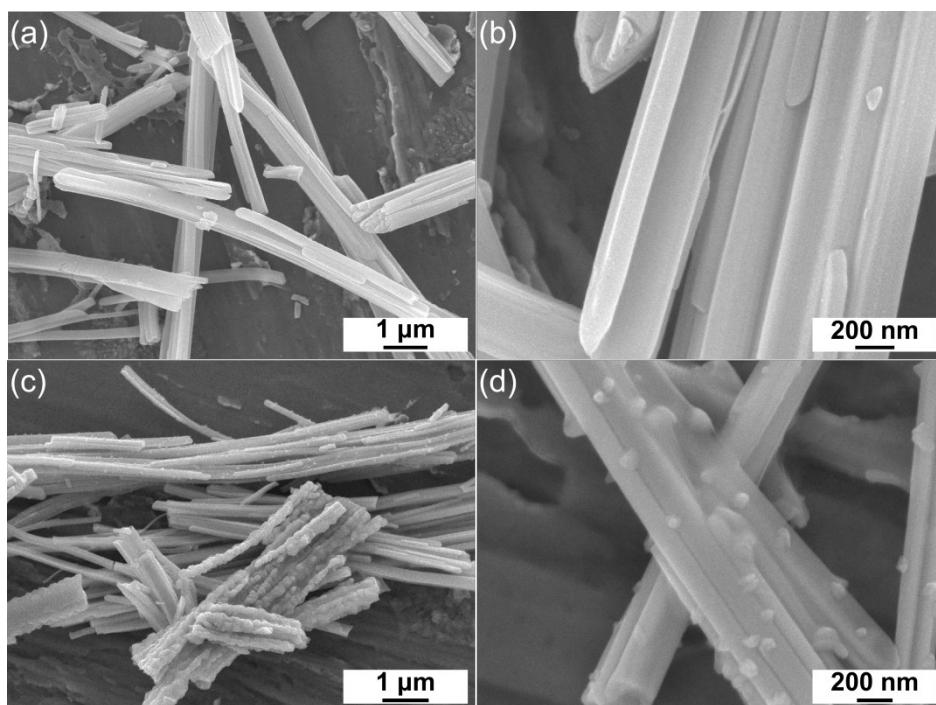

Fig. S4. SEM images of Mo-3atz synthesized under 70 °C (a, b), and as-prepared  $\alpha$ -MoC (c, d)

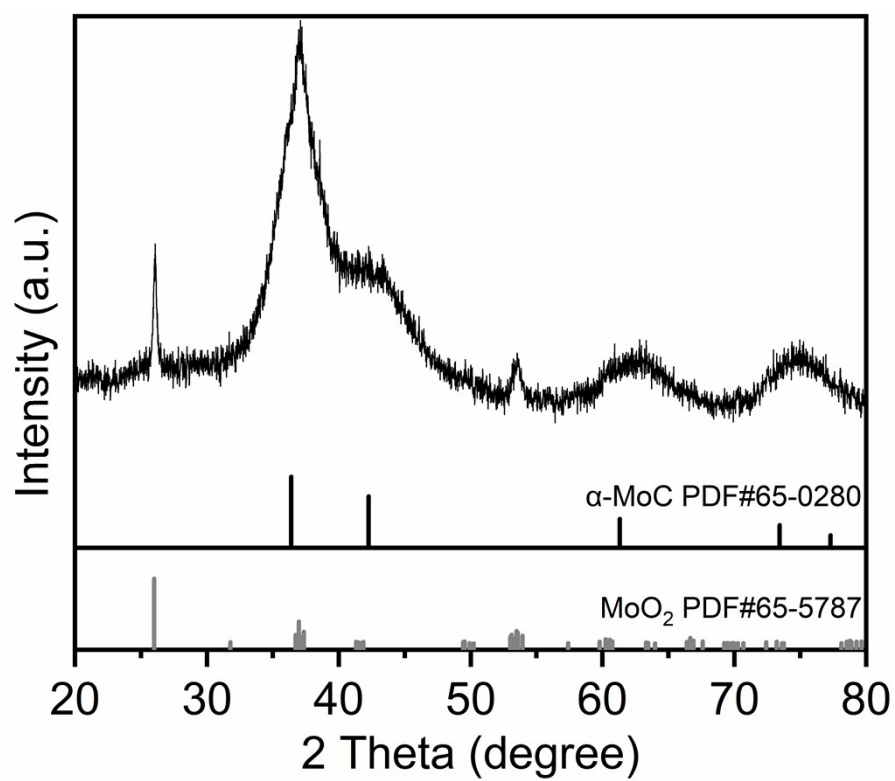

Fig. S5. XRD pattern of Mo-3atz calcined under Ar atmosphere.



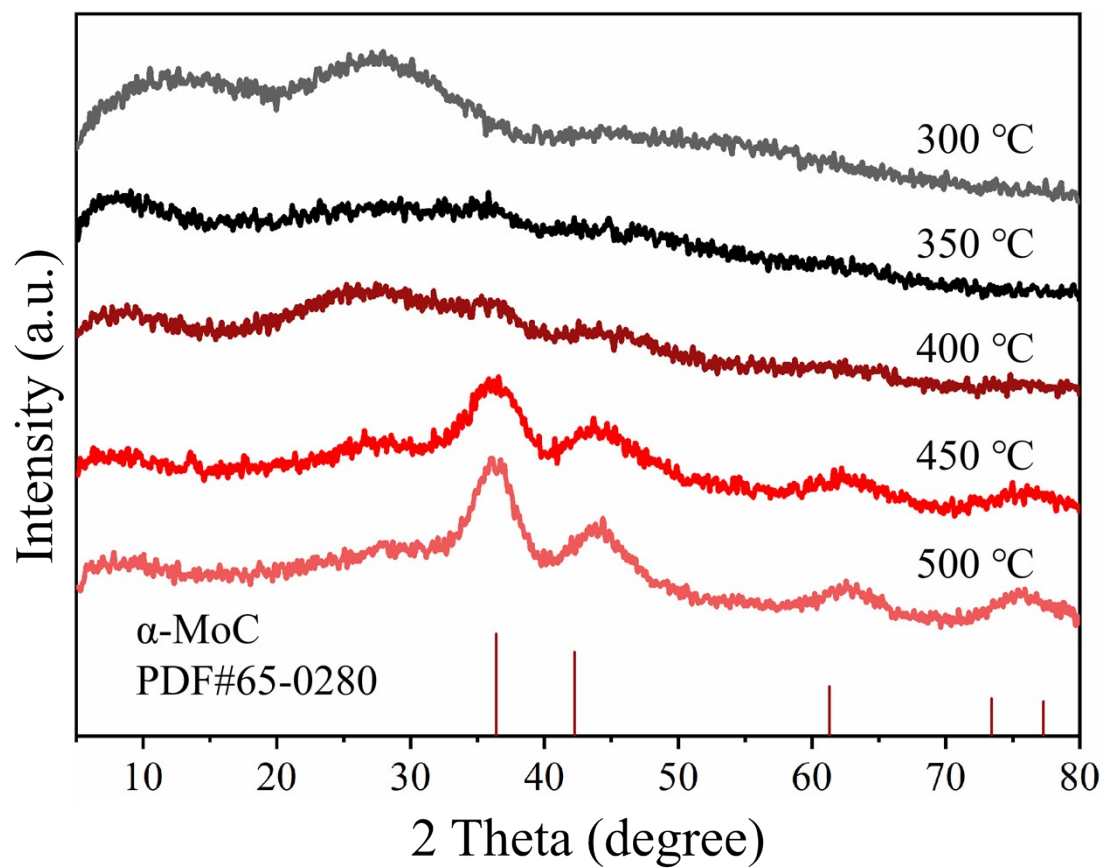

Fig. S6. XRD patterns of Mo-3atz precursor calcined under various temperatures.

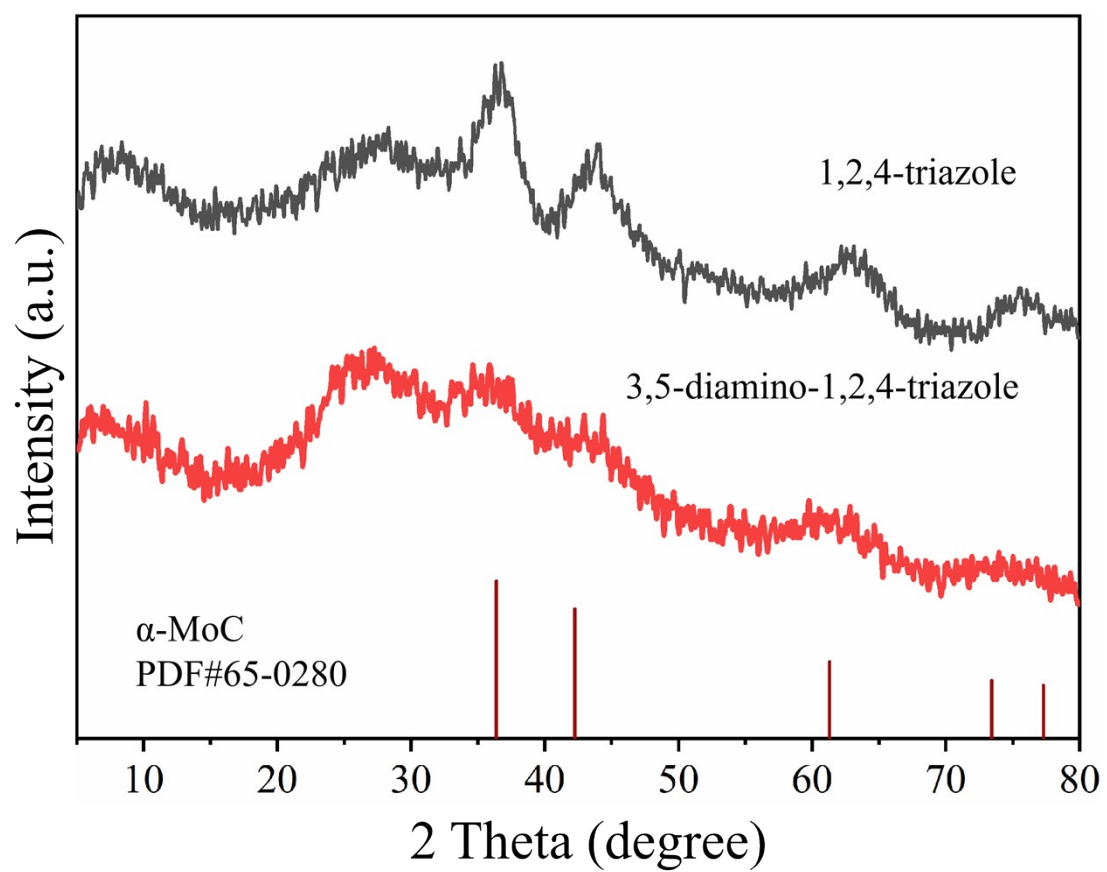

Fig. S7. XRD patterns of samples synthesized using other ligands.

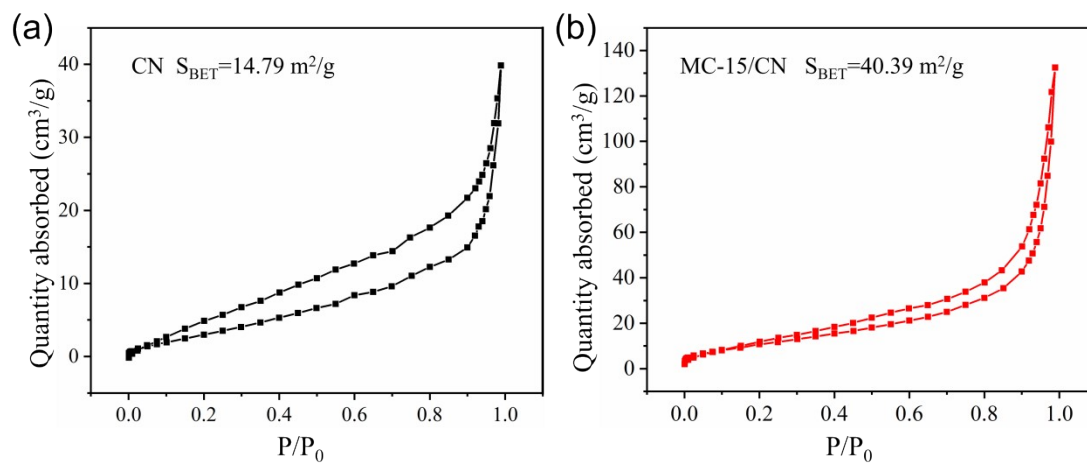

Fig. S8.  $\text{N}_2$  adsorption-desorption isotherms of CN and MC-15/CN.

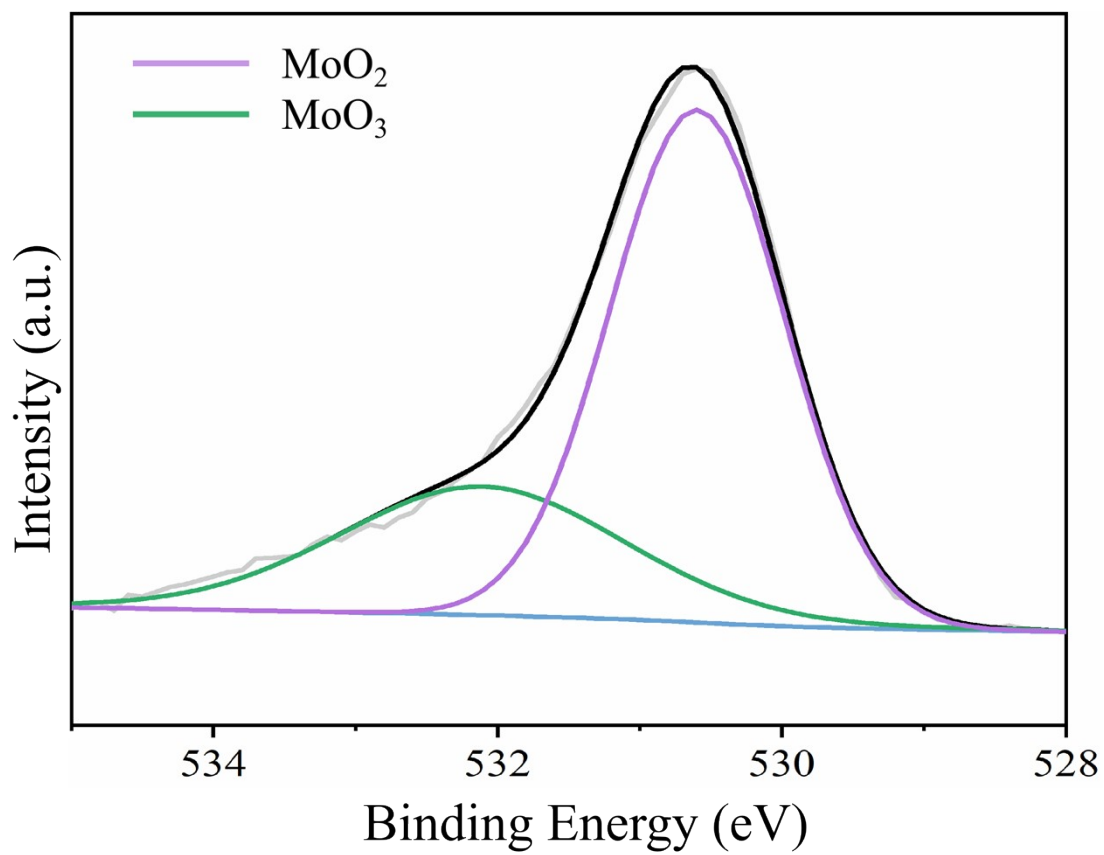

Fig. S9. The high-resolution O 1s spectrum of  $\alpha$ -MoC.

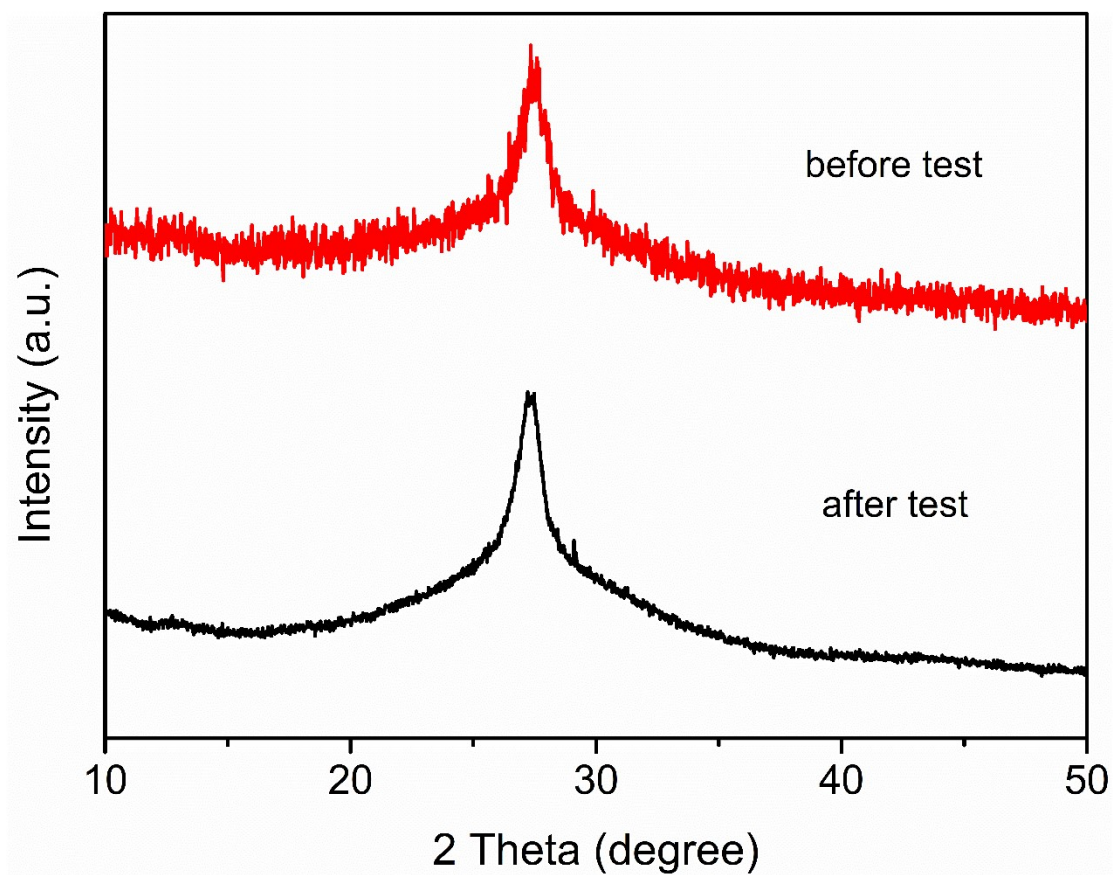

Fig. S10. XRD patterns of MC-15/CN photocatalyst before and after the recycle test.

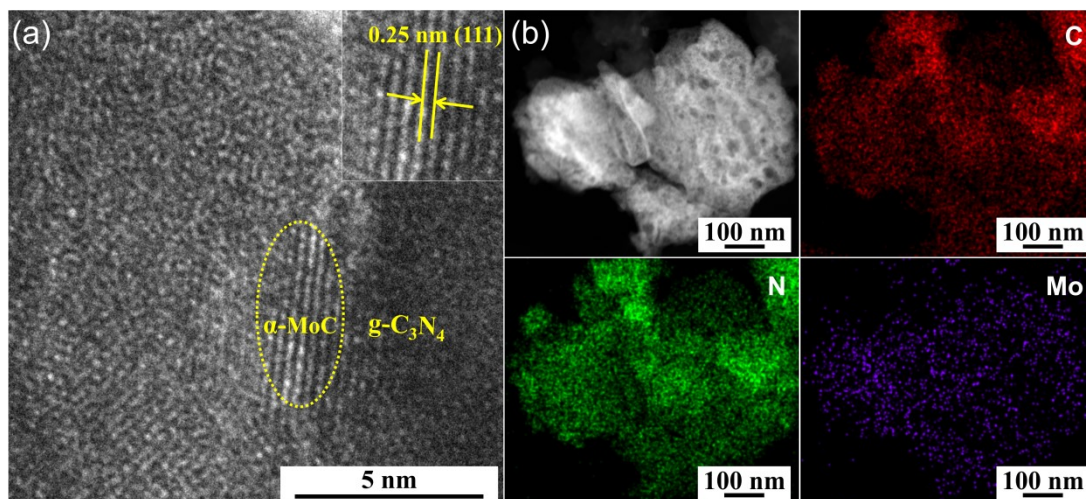

Fig. S11. (a) HRTEM image and (b) EDS element mapping of MC-15/CN photocatalyst after the recycle test.

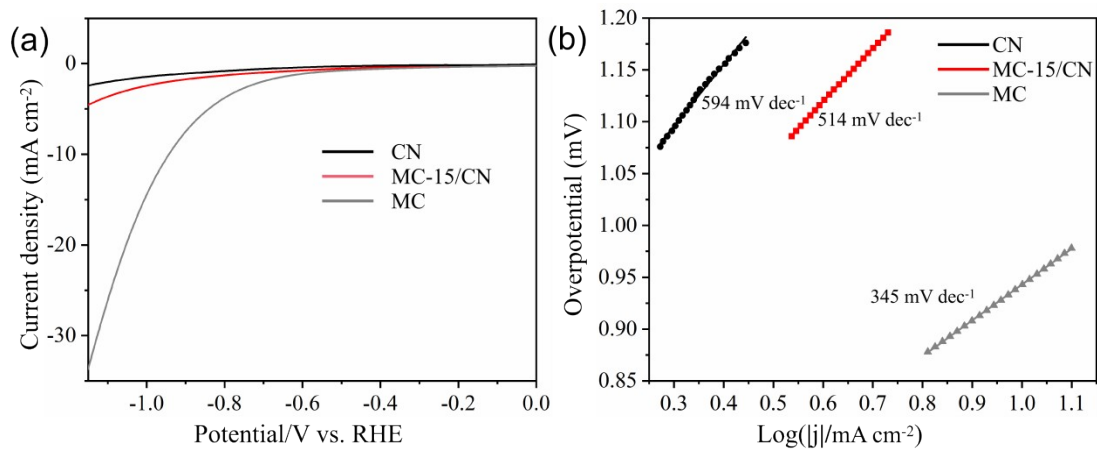

Fig. S12. LSV (a) and Tafel (b) curves of CN, MC-15/CN and MC.

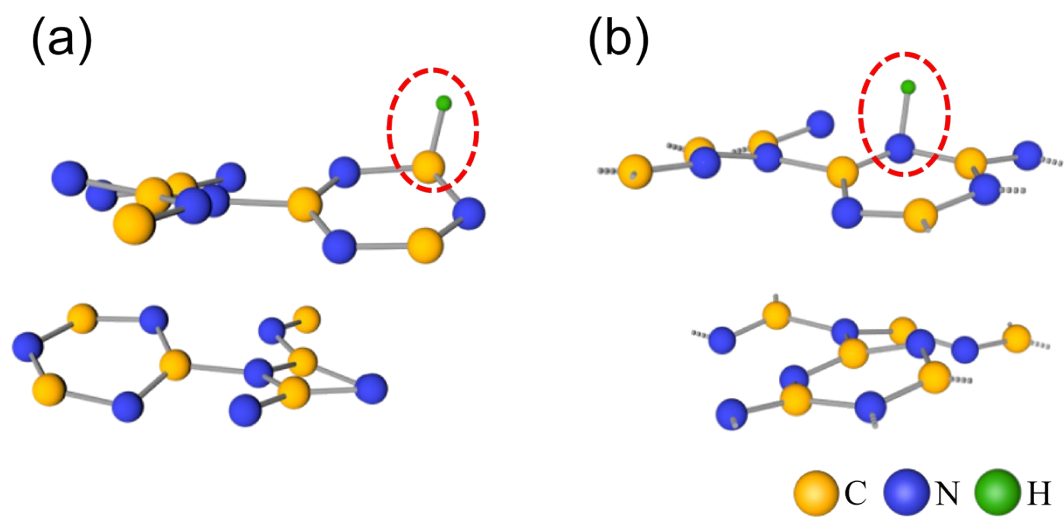

Fig. S13. The models of H\* adsorption sites on the surface of g-C<sub>3</sub>N<sub>4</sub>: (a) C site, and (b) N site.



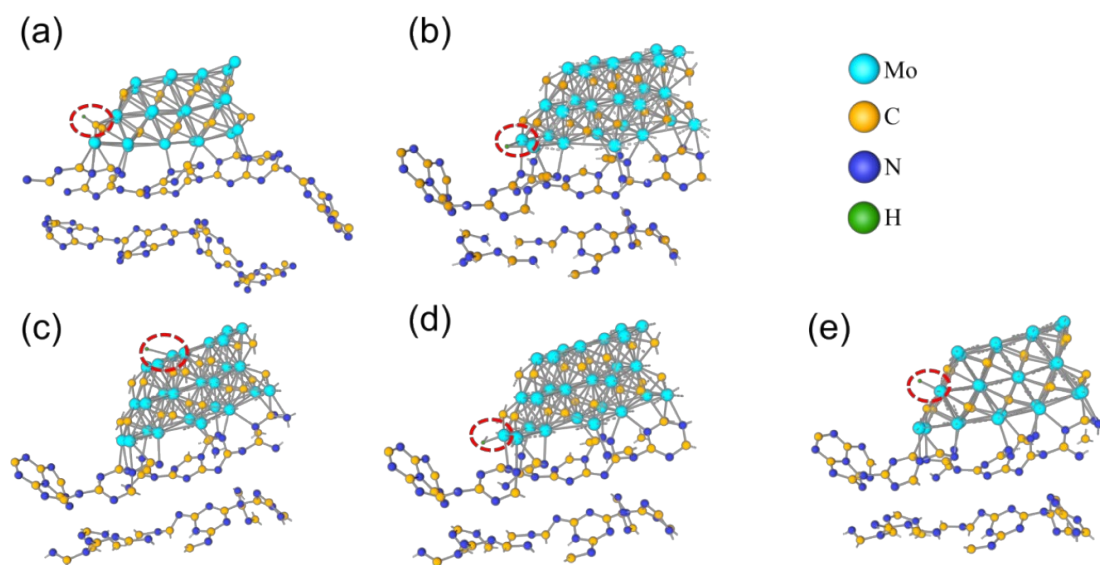

Fig. S14. The models of  $H^*$  adsorption sites of on the surface of  $\alpha$ -MoC ( $\alpha$ -MoC/g- $C_3N_4$ ): (a)  $C_1$  site, (b)  $Mo_1$  site, (c)  $Mo_2$  site, (d)  $Mo_3$  site, and (e)  $Mo_4$  site.

Table S1. Comparison of the synthesis temperature and size of molybdenum carbide from literatures.

| <b>Material</b>     | <b>Synthesis temperature (°C)</b> | <b>Atmosphere</b>                                 | <b>Size (nm)</b> | <b>Reference</b> |
|---------------------|-----------------------------------|---------------------------------------------------|------------------|------------------|
| MoC                 | 1000                              | Ar                                                | ~5               | 1                |
| Mo <sub>x</sub> C   | 1000                              | Ar                                                | 8.9 ± 3.4        | 2                |
| C-Mo <sub>x</sub> C | 900                               | N <sub>2</sub>                                    | 1-3 (ball mill)  | 3                |
| Mo <sub>2</sub> C   | 800                               | Ar                                                | 14.9             | 4                |
| Mo <sub>2</sub> C   | 800                               | Ar                                                | ~8.5             | 5                |
| MoC                 | 800                               | NH <sub>3</sub>                                   | 7                | 6                |
| MoC                 | 800                               | N <sub>2</sub>                                    | ~5               | 7                |
| Mo <sub>2</sub> C@C | 800                               | Inert                                             | ~5               | 8                |
| Mo <sub>2</sub> C   | 800                               | Ar                                                | ~4               | 9                |
| Mo <sub>2</sub> C   | 800                               | Ar                                                | 3-5              | 10               |
| Mo <sub>2</sub> C   | 750                               | Ar                                                | ~3               | 11               |
| α-MoC               | 720                               | CH <sub>4</sub> /H <sub>2</sub>                   | ~10              | 12               |
| α-MoC               | 700                               | NH <sub>3</sub> , CH <sub>4</sub> /H <sub>2</sub> | 5-10             | 13               |
| α-MoC               | 700                               | NH <sub>3</sub> , CH <sub>4</sub> /H <sub>2</sub> | 2-5              | 14               |
| MoC-QDs/C           | 700                               | Ar                                                | 2-5              | 15               |
| Mo <sub>2</sub> C   | 675                               | Ar                                                | 6.8 ± 1.3        | 16               |
| <b>α-MoC</b>        | <b>450-550</b>                    | <b>H<sub>2</sub>/Ar</b>                           | <b>~1.8</b>      | <b>This work</b> |

Table S2. Comparison of various cocatalysts coupled with g-C<sub>3</sub>N<sub>4</sub> photocatalyst for solar H<sub>2</sub> evolution from literatures.

| Photocatalyst                                                | Sacrificial agent | Light source                                  | H <sub>2</sub> evolution rate (μmol h <sup>-1</sup> g <sup>-1</sup> ) | Ref              |
|--------------------------------------------------------------|-------------------|-----------------------------------------------|-----------------------------------------------------------------------|------------------|
| Mo <sub>2</sub> C/g-C <sub>3</sub> N <sub>4</sub>            | TEOA              | 300 W<br>Xe lamp<br>(λ > 420 nm)              | 60.9                                                                  | 17               |
| 2.0wt.% Mo-Mo <sub>2</sub> C/g-C <sub>3</sub> N <sub>4</sub> | TEOA              | 300 W<br>Xe lamp<br>(λ > 420 nm)              | 219                                                                   | 17               |
| MoC-Li/g-C <sub>3</sub> N <sub>4</sub>                       | TEOA              | 300 W<br>Xe lamp<br>(λ > 420 nm)              | 130                                                                   | 9                |
| CN-1M (Mo <sub>2</sub> C/g-C <sub>3</sub> N <sub>4</sub> )   | TEOA              | 300W<br>Xe lamp<br>(λ > 420 nm)               | 507                                                                   | 18               |
| MoSe <sub>2</sub> /g-C <sub>3</sub> N <sub>4</sub>           | TEOA              | 300 W<br>Xe lamp<br>(λ > 420 nm)              | 136.8                                                                 | 19               |
| WC/g-C <sub>3</sub> N <sub>4</sub>                           | TEOA              | 300 W<br>Xe lamp<br>(λ > 420 nm)              | 146.1                                                                 | 20               |
| WS <sub>2</sub> /g-C <sub>3</sub> N <sub>4</sub>             | TEOA              | 300 W<br>Xe lamp<br>(1.5 W cm <sup>-2</sup> ) | 154                                                                   | 21               |
| Ni <sub>2</sub> P/g-C <sub>3</sub> N <sub>4</sub>            | TEOA              | 300 W<br>Xe lamp<br>(λ > 420 nm)              | 82.5                                                                  | 22               |
| 2% MWNTS/g-C <sub>3</sub> N <sub>4</sub>                     | Methanol          | 300 W<br>Xe lamp<br>(λ > 400 nm)              | 75.8                                                                  | 23               |
| <b>MC-15/CN</b>                                              | <b>TEOA</b>       | <b>300 W<br/>Xe lamp<br/>(λ &gt; 400 nm)</b>  | <b>180</b>                                                            | <b>This work</b> |

Table S3. Kinetic analysis of emission decay of g-C<sub>3</sub>N<sub>4</sub> and composite photocatalysts.

| Samples  | Decay life time (ns) |          |          | Fractional contribution |       |       | X <sup>2</sup> | Average lifetime (ns) |
|----------|----------------------|----------|----------|-------------------------|-------|-------|----------------|-----------------------|
|          | $\tau_1$             | $\tau_2$ | $\tau_3$ | $f_1$                   | $f_2$ | $f_3$ |                |                       |
| CN       | 0.95                 | 3.37     | 13.38    | 32.5                    | 46.2  | 21.3  | 1.15           | 4.71                  |
| MC-6/CN  | 0.94                 | 3.58     | 14.70    | 31.6                    | 49.1  | 19.2  | 1.15           | 4.88                  |
| MC-9/CN  | 1.20                 | 4.09     | 15.61    | 33.0                    | 49.7  | 17.3  | 1.11           | 5.13                  |
| MC-12/CN | 1.27                 | 4.24     | 15.37    | 36.3                    | 45.5  | 18.2  | 1.30           | 5.19                  |
| MC-15/CN | 1.37                 | 4.39     | 16.39    | 33.5                    | 50.7  | 15.8  | 1.19           | 5.27                  |
| MC-18/CN | 1.33                 | 4.30     | 15.70    | 40.2                    | 44.9  | 15.0  | 1.26           | 4.80                  |

Table S4. The  $\Delta G_{H^*}$  values of all the adsorption models.

| Models                                        | Adsorption site (Model) | $\Delta G_{H^*}$ (eV) |
|-----------------------------------------------|-------------------------|-----------------------|
| g-C <sub>3</sub> N <sub>4</sub>               | C (S8.a)                | -0.2301               |
|                                               | N (S8.b)                | 1.7146                |
|                                               | C <sub>1</sub> (S9.a)   | -0.0443               |
| $\alpha$ -MoC/g-C <sub>3</sub> N <sub>4</sub> | Mo <sub>1</sub> (S9.b)  | -0.0751               |
|                                               | Mo <sub>2</sub> (S9.c)  | -0.9347               |
|                                               | Mo <sub>3</sub> (S9.d)  | -0.3280               |
|                                               | Mo <sub>4</sub> (S9.e)  | 0.3858                |

## Supplementary References

- 1 H. Shi, Z. Sun, W. Lv, S. Wang, Y. Shi, Y. Zhang, S. Xiao, H. Yang, Q.-H. Yang and F. Li, Necklace-like MoC sulfiphilic sites embedded in interconnected carbon networks for Li-S batteries with high sulfur loading, *J. Mater. Chem. A.*, 2019, **7**, 11298-11304.
- 2 Y. Liu, X. Zhu, Q. Zhang, T. Tang, Y. Zhang, L. Gu, Y. Li, J. Bao, Z. Dai and J.-S. Hu, Engineering Mo/Mo<sub>2</sub>C/MoC hetero-interfaces for enhanced electrocatalytic nitrogen reduction, *J. Mater. Chem. A.*, 2020, **8**, 8920-8926.
- 3 Z. Yan, G. He, P. K. Shen, Z. Luo, J. Xie and M. Chen, MoC-graphite composite as a Pt electrocatalyst support for highly active methanol oxidation and oxygen reduction reaction, *J. Mater. Chem. A.*, 2014, **2**, 4014.
- 4 M. Li, Y. Zhu, H. Wang, C. Wang, N. Pinna and X. Lu, Ni strongly coupled with Mo<sub>2</sub>C encapsulated in nitrogen-doped carbon nanofibers as robust bifunctional catalyst for overall water splitting, *Adv. Energy Mater.*, 2019, **9**, 1803185.
- 5 Y. Y. Chen, Y. Zhang, W. J. Jiang, X. Zhang, Z. Dai, L. J. Wan and J. S. Hu, Pomegranate-like N,P-doped Mo<sub>2</sub>C@C nanospheres as highly active electrocatalysts for alkaline hydrogen evolution, *ACS Nano*, 2016, **10**, 8851-8860.
- 6 H. Yan, Y. Xie, Y. Jiao, A. Wu, C. Tian, X. Zhang, L. Wang and H. Fu, Holey reduced graphene oxide coupled with an Mo<sub>2</sub>N-Mo<sub>2</sub>C heterojunction for efficient hydrogen evolution, *Adv. Mater.*, 2018, **30**, 1704156.
- 7 Y. Liu, Y. Zhang, Y. Zhang, Q. Zhang, X. Gao, X. Dou, H. Zhu, X. Yuan and L. Pan, MoC nanoparticle-embedded carbon nanofiber aerogels as flow-through

- electrodes for highly efficient pseudocapacitive deionization, *J. Mater. Chem. A.*, 2020, **8**, 1443-1450.
- 8 J. Liu, P. Wang, J. Fan, H. Yu and J. Yu, Hetero-phase MoC-Mo<sub>2</sub>C nanoparticles for enhanced photocatalytic H<sub>2</sub>-production activity of TiO<sub>2</sub>, *Nano Res.*, 2020, **14**, 1095-1102.
- 9 F. Yang, D. Liu, Y. Li, L. Cheng and J. Ye, Lithium incorporation assisted synthesis of ultra-small Mo<sub>2</sub>C nanodots as efficient photocatalytic H<sub>2</sub> evolution cocatalysts, *Chem. Eng. J.*, 2020, **399**, 125794.
- 10 Y. Liu, G. Yu, G. D. Li, Y. Sun, T. Asefa, W. Chen and X. Zou, Coupling Mo<sub>2</sub>C with nitrogen-rich nanocarbon leads to efficient hydrogen-evolution electrocatalytic sites, *Angew. Chem. Int. Ed.*, 2015, **54**, 10752-10757.
- 11 Y. Huang, Q. Gong, X. Song, K. Feng, K. Nie, F. Zhao, Y. Wang, M. Zeng, J. Zhong and Y. Li, Mo<sub>2</sub>C nanoparticles dispersed on hierarchical carbon microflowers for efficient electrocatalytic hydrogen evolution, *ACS Nano*, 2016, **10**, 11337-11343.
- 12 X. Li, J. Zhang, R. Wang, H. Huang, C. Xie, Z. Li, J. Li and C. Niu, In situ synthesis of carbon nanotube hybrids with alternate MoC and MoS<sub>2</sub> to enhance the electrochemical activities of MoS<sub>2</sub>, *Nano Lett.*, 2015, **15**, 5268-5272.
- 13 L. Lin, Q. Yu, M. Peng, A. Li, S. Yao, S. Tian, X. Liu, A. Li, Z. Jiang, R. Gao, X. Han, Y. W. Li, X. D. Wen, W. Zhou and D. Ma, Atomically dispersed Ni/alpha-MoC catalyst for hydrogen production from methanol/water, *J. Am. Chem. Soc.*, 2021, **143**, 309-317.

- 14 Y. Deng, R. Gao, L. Lin, T. Liu, X. D. Wen, S. Wang and D. Ma, Solvent tunes the selectivity of hydrogenation reaction over alpha-MoC catalyst, *J. Am. Chem. Soc.*, 2018, **140**, 14481-14489.
- 15 F. Gao, Y. Zhao, L. Zhang, B. Wang, Y. Wang, X. Huang, K. Wang, W. Feng and P. Liu, Well dispersed MoC quantum dots in ultrathin carbon films as efficient co-catalysts for photocatalytic H<sub>2</sub> evolution, *J. Mater. Chem. A.*, 2018, **6**, 18979-18986.
- 16 C. Wan, N. A. Knight and B. M. Leonard, Crystal structure and morphology control of molybdenum carbide nanomaterials synthesized from an amine-metal oxide composite, *Chem Commun (Camb)*, 2013, **49**, 10409-10411.
- 17 J. Dong, Y. Shi, C. Huang, Q. Wu, T. Zeng and W. Yao, A new and stable Mo-Mo<sub>2</sub>C modified g-C<sub>3</sub>N<sub>4</sub> photocatalyst for efficient visible light photocatalytic H<sub>2</sub> production, *Appl. Catal. B Environ.*, 2019, **243**, 27-35.
- 18 J. Zhang, M. Wu, B. He, R. Wang, H. Wang and Y. Gong, Facile synthesis of rod-like g-C<sub>3</sub>N<sub>4</sub> by decorating Mo<sub>2</sub>C co-catalyst for enhanced visible-light photocatalytic activity, *Appl. Surf. Sci.*, 2019, **470**, 565-572.
- 19 D. Zeng, P. Wu, W.-J. Ong, B. Tang, M. Wu, H. Zheng, Y. Chen and D.-L. Peng, Construction of network-like and flower-like 2H-MoSe<sub>2</sub> nanostructures coupled with porous g-C<sub>3</sub>N<sub>4</sub> for noble-metal-free photocatalytic H<sub>2</sub> evolution under visible light, *Appl. Catal. B Environ.*, 2018, **233**, 26-34.
- 20 K. He, J. Xie, Z. Yang, R. Shen, Y. Fang, S. Ma, X. Chen and X. Li, Earth-abundant WC nanoparticles as an active noble-metal-free co-catalyst for the



- highly boosted photocatalytic H<sub>2</sub> production over g-C<sub>3</sub>N<sub>4</sub> nanosheets under visible light, *Catal. Sci. Technol.*, 2017, **7**, 1193-1202.
- 21 Y. Zhou, X. Ye and D. Lin, One-pot synthesis of non-noble metal WS<sub>2</sub>/g-C<sub>3</sub>N<sub>4</sub> photocatalysts with enhanced photocatalytic hydrogen production, *Int. J. Hydrogen Energy*, 2019, **44**, 14927-14937.
- 22 P. Ye, X. Liu, J. Iocozzia, Y. Yuan, L. Gu, G. Xu and Z. Lin, A highly stable non-noble metal Ni<sub>2</sub>P co-catalyst for increased H<sub>2</sub> generation by g-C<sub>3</sub>N<sub>4</sub> under visible light irradiation, *J. Mater. Chem. A.*, 2017, **5**, 8493-8498.
- 23 L. Ge and C. Han, Synthesis of MWNTs/g-C<sub>3</sub>N<sub>4</sub> composite photocatalysts with efficient visible light photocatalytic hydrogen evolution activity, *Appl. Catal. B Environ.*, 2012, **117-118**, 268-274.
